# Supplementary material
Source: PubMed Central journal article supplement (PMC7773345)
Supplement: jci-131-140177-s174.pdf [file jci-131-140177-s174.pdf]

Figure S1

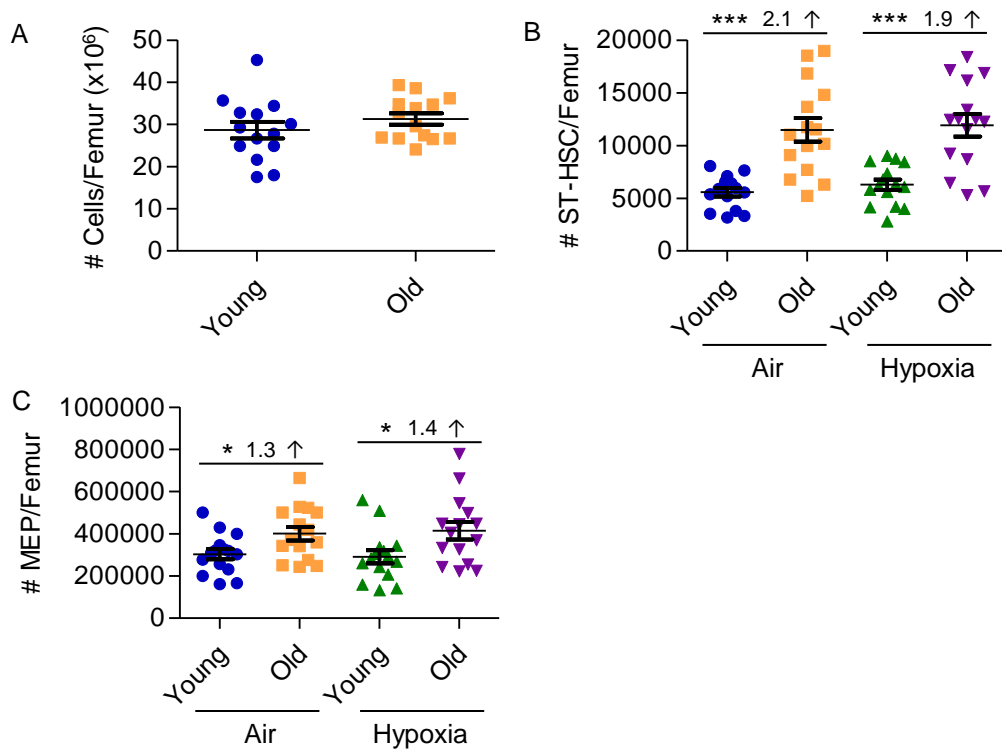

**Figure S1. BM HSC and HPC phenotyping of young and old C57BL/6 mice collected in hypoxia (3% O<sub>2</sub>) and processed under ambient air (21% O<sub>2</sub>) versus hypoxia.** In a hypoxic chamber (acclimated for 18 hours to 3% O<sub>2</sub>), femurs of young (8-12 week old) and old (20-28 month old) male and female C57BL/6 mice were flushed in sterile PBS, counted, and then split in half. One half remained under hypoxic conditions (indicated as 'Hypoxia') and the other was removed from the hypoxic glove box and acclimated for 1 hour to ambient air conditions (indicated as 'Air'). Nucleated BM cells from each group were analyzed by flow cytometry (see Figure 1A for experimental setup). (A) Absolute nucleated cell counts of femurs isolated from young and old male and female C57BL/6 mice. (B) Short-term (ST)-HSC number per femur. (C) Megakaryocyte-erythrocyte progenitor (MEP) number per femur. (A-C) Data represents SEM of 11-15 C57BL/6 mice from 3-4 experiments. \* p<0.05 and \*\*\* p<0.001 as determined by One-way ANOVA with post-hoc Tukey's Multiple Comparison Test.

Figure S2

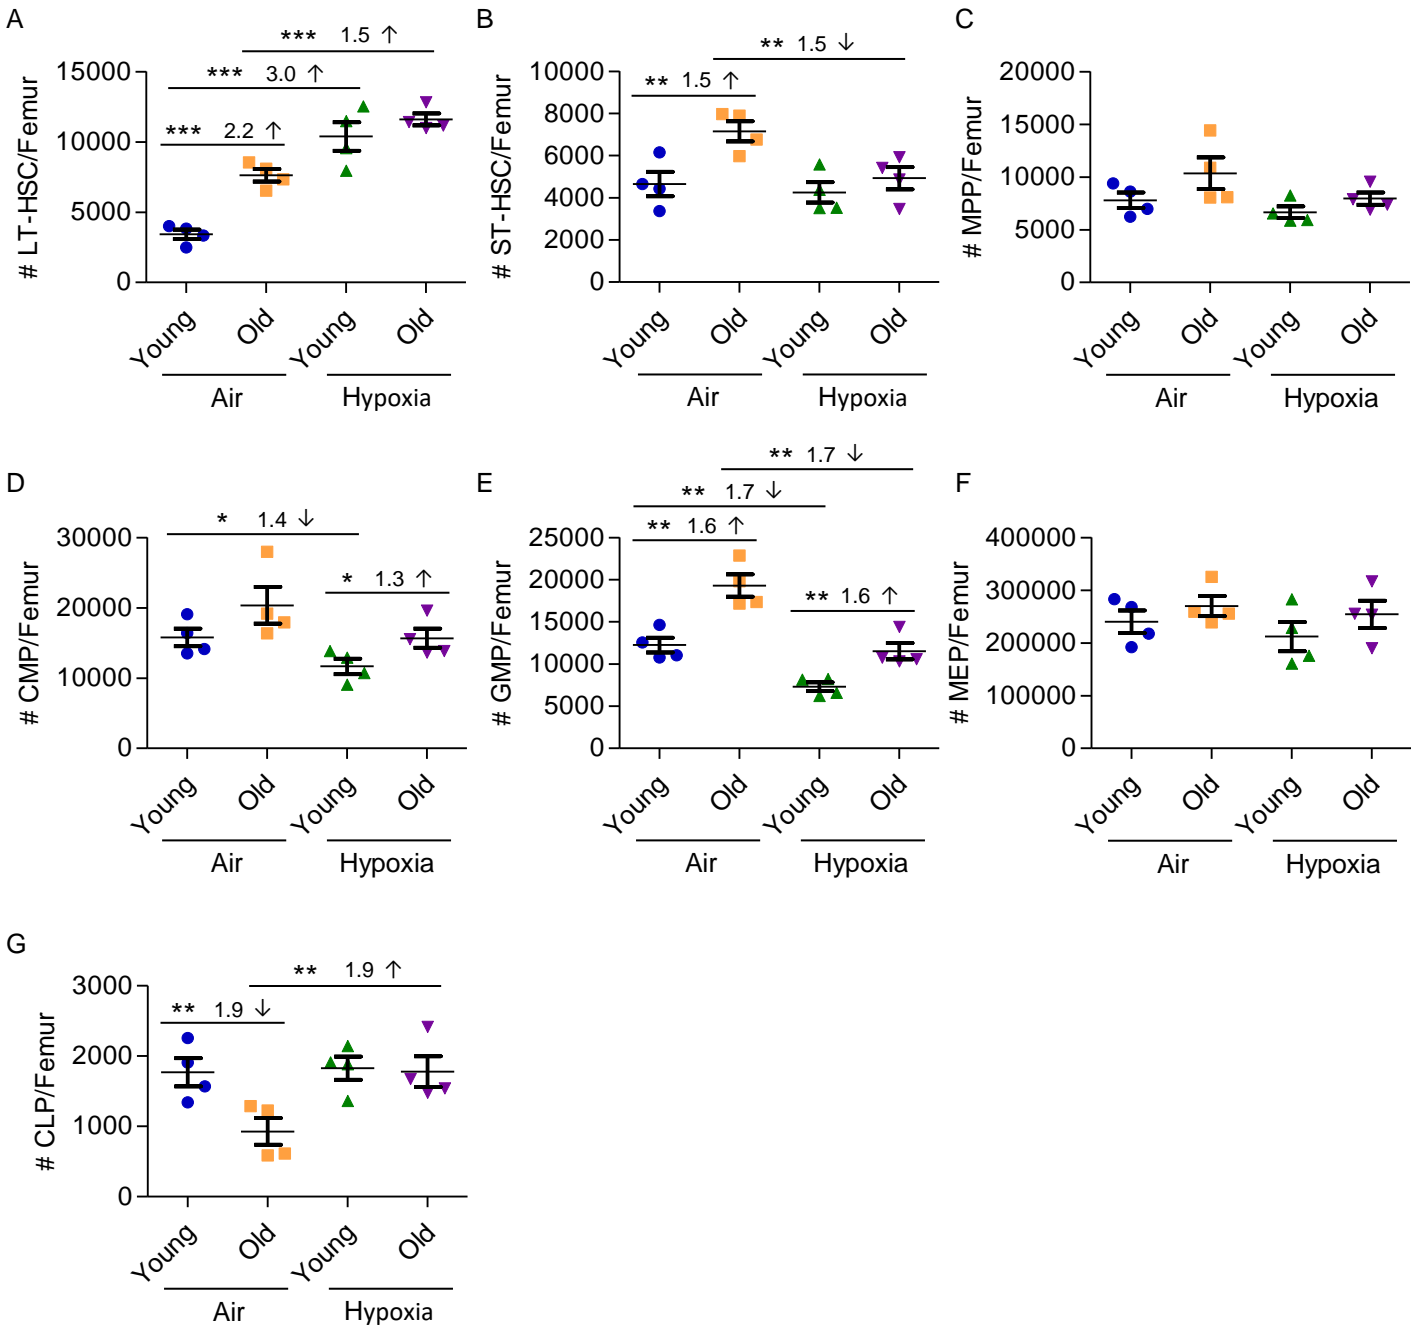

**Figure S2. BM HSC and HPC phenotyping of young and old CB6 mice collected in hypoxia and processed under ambient air versus hypoxia.** BM cells from young and old CB6 donor mice were collected/processed as noted in Figure 1A then flow cytometry was performed. (A) Long-term (LT)-HSC numbers per femur. (B) ST-HSC numbers per femur. (D) multipotent progenitor (MPP) numbers per femur. (E) Common myeloid progenitor (CMP) numbers per femur. (F) Granulocyte macrophage progenitor (GMP) numbers per femur. (G) MEP numbers per femur. (H) Common lymphoid progenitor (CLP) numbers per femur. Data represents SEM of 4 CB6 mice. \*  $p < 0.05$ , \*\*  $p < 0.01$ , and \*\*\*  $p < 0.001$  as determined by One-way ANOVA with post-hoc Tukey's Multiple Comparison Test.

Figure S3

CB6

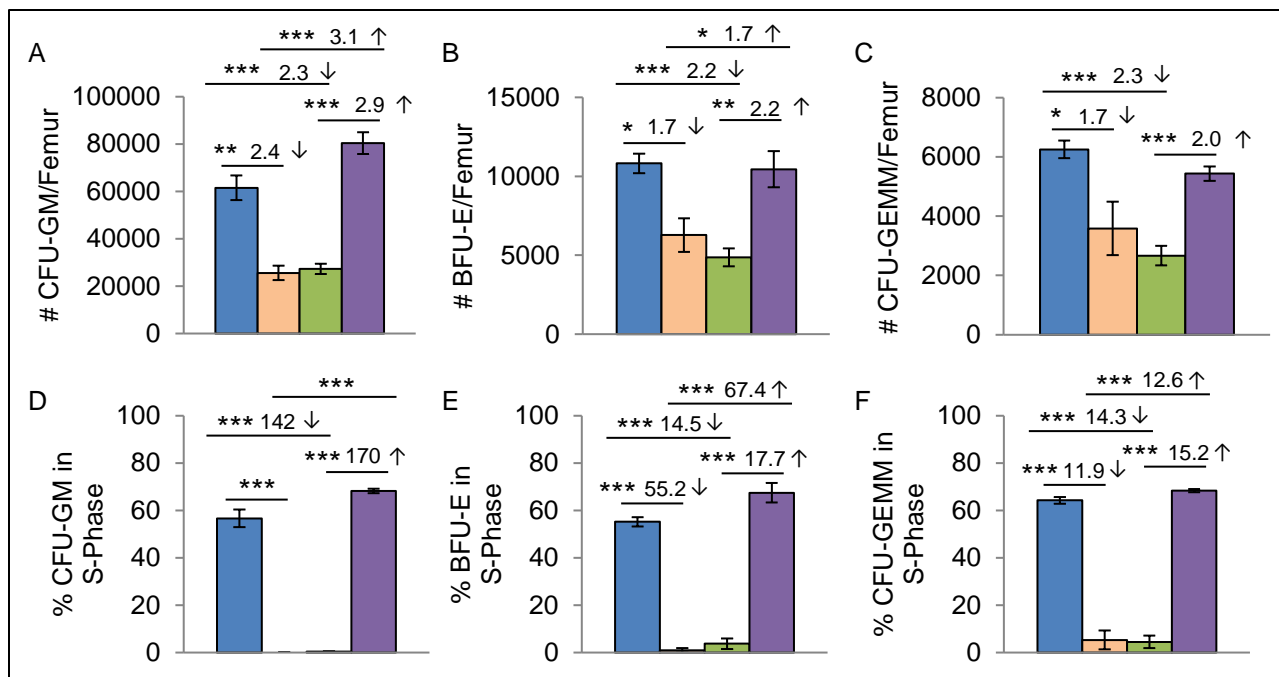

BALB/c

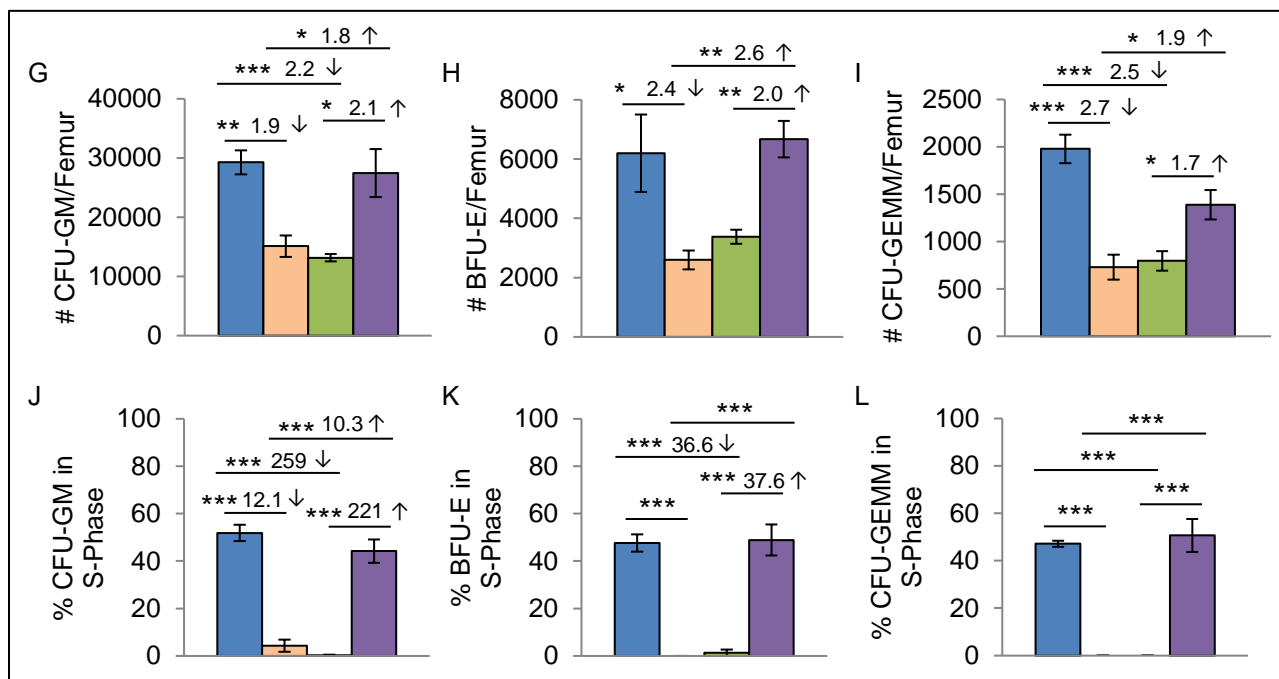

■ Young Air  
■ Old Air  
■ Young Hypoxia  
■ Old Hypoxia

**Figure S3. Numbers of functional HPC, assessed by colony assay, of young and old CB6 and BALB/c mice collected in hypoxia and processed under ambient air versus hypoxia.** In a hypoxic glove box (3% O<sub>2</sub>), femurs of young (8-12 weeks old) and old (24-25 months old) CB6 (A-F) and BALB/c (G-L) were processed as in Figure 1A. After acclimation time, nucleated BM cells from each group were utilized in a HPC colony forming cell assay stimulated *in vitro* with EPO, SCF, PWMSCM, and hemin (A-C and G-I) with the percent of HPC in S-phase defined by high specific activity tritiated thymidine kill assay (D-F and J-L). Numbers of colony-forming units granulocyte-macrophage (CFU-GM; A, D, G, and J), burst-forming unit erythroid (BFU-E; B, E, H, and K) and CFU granulocyte-erythrocyte-macrophage-megakaryocyte (CFU-GEMM; C, F, I, and L) were calculated per femur. Data represents SEM of 4 CB6 and BALB/c mice. \* p<0.05, \*\* p<0.01, and \*\*\* p<0.001 as determined by One-way ANOVA with post-hoc Tukey's Multiple Comparison Test.

Figure S4

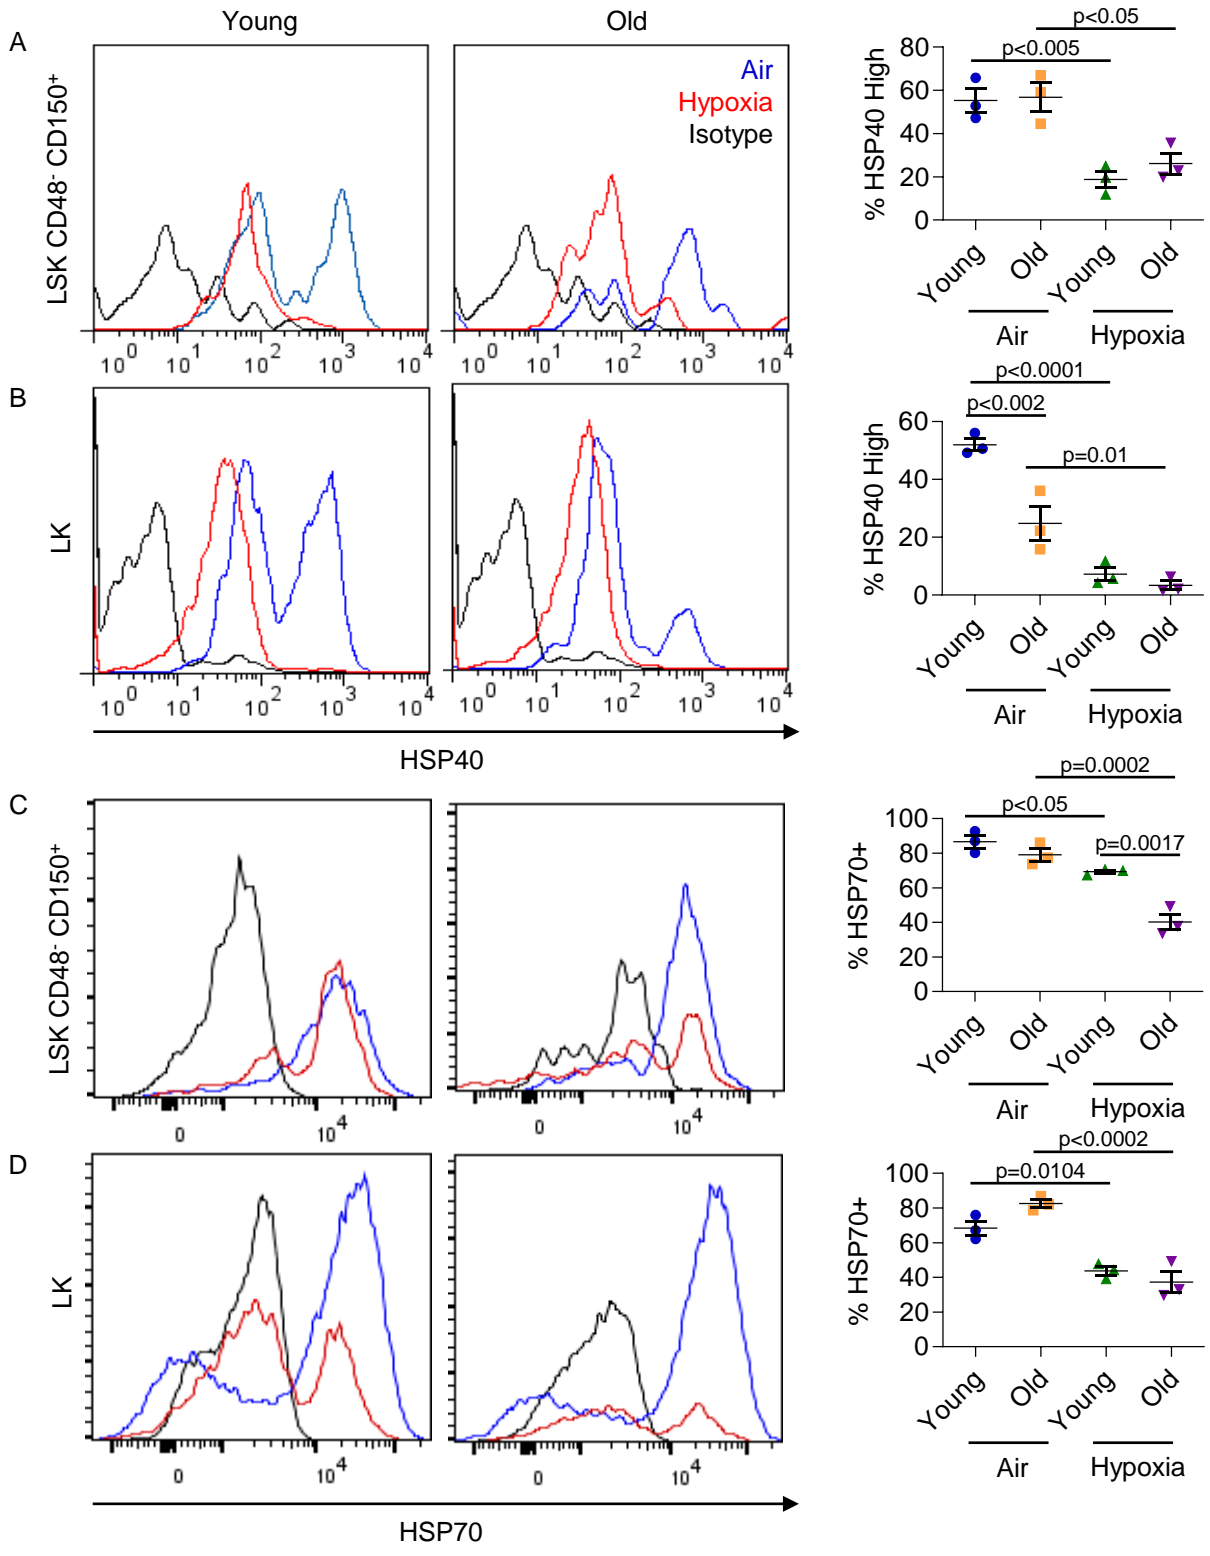

**Figure S4. HSC and HPC HSP40 and HSP70 expression in the BM of young and old C57BL/6 mice collected in hypoxia and processed under ambient air versus hypoxia.** BM cells from young and old C57BL/6 donor mice were collected/processed as noted in Figure 1A. HSC (LSK CD48<sup>-</sup> CD150<sup>+</sup>; A&C), and LK (B&D) cells were analyzed by flow cytometry for HSP40 (A-B) and HSP70 (C-D) expression. Data are representative of 2 separate experiments. Data represents SEM of 3 C57BL/6 mice per group. Statistics were determined by One-way ANOVA with post-hoc Tukey's Multiple Comparison Test.

Figure S5

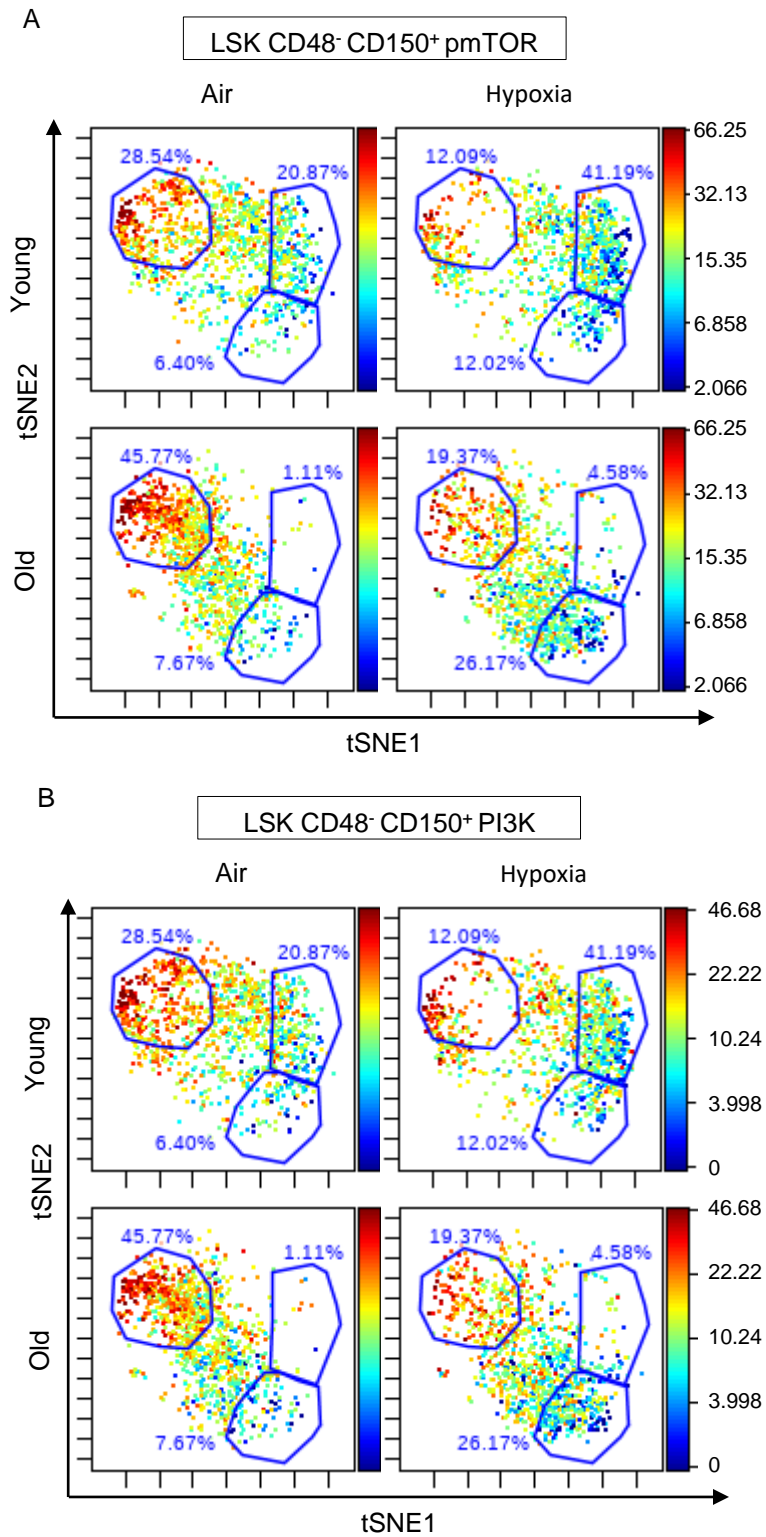



**Figure S5. PI3K and pmTOR expression is decreased in hypoxia collected and processed LT-HSC in BM of young and old mice.** pmTOR (A) and PI3K (B) levels within gated LSK CD48<sup>-</sup> CD150<sup>+</sup> plots using viSNE analysis. Scales are the mean marker intensity of ArcSinh transformed values. (A&B) Populations changed by ambient air exposure are labeled as gate I, II and III. Percent of cells within the gate are indicated. Data is a representative of three separate experiments.

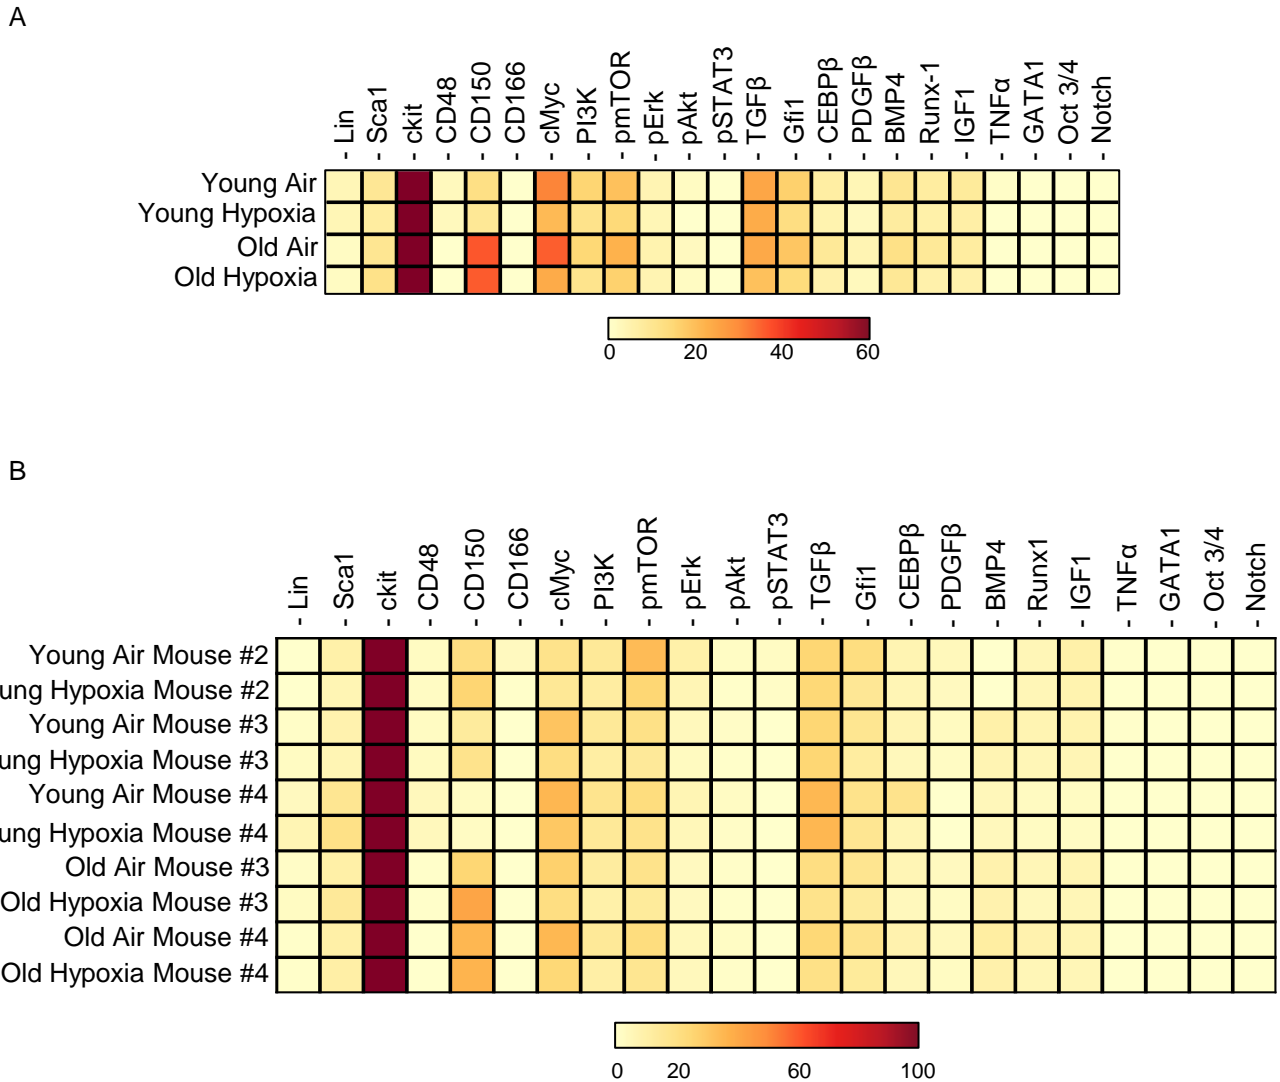

**Figure S6. CyTOF analysis of gated LT-HSCs among ambient air-acclimated and hypoxia-collected and processed lineage negative BM cells.** BM from young and old C57BL/6 donor mice were collected/processed as in Figure 1A. Samples were stained with indicated antibodies conjugated to metal (see Table S3), then analyzed by CyTOF 2 mass cytometer and Cytbank software. (A) Heatmap of total LSK CD48- CD150+ LT-HSC population protein concentrations shown in Figure 6 and Figure S5 of indicated mice determined through analysis of normalized CyTOF events. (B) Heatmap of replicate experiments shown in (A).

Table S1: Determination of CRU frequency by limiting dilution assay.

| Group         | Number of cells transplanted | Number of mice with >15% donor chimerism/total number of mice | CRU frequency | 95% confidence interval | Number of CFU in $1 \times 10^6$ BM cells |
|---------------|------------------------------|---------------------------------------------------------------|---------------|-------------------------|-------------------------------------------|
| Young Air     | 25,000                       | 0/5                                                           | 1/51,471      | 1/106,096 to 1/24,970   | 19.4                                      |
|               | 50,000                       | 3/4                                                           |               |                         |                                           |
|               | 100,000                      | 5/5                                                           |               |                         |                                           |
| Old Air       | 25,000                       | 0/5                                                           | 1/221,246     | 1/670,272 to 1/73,030   | 4.52 <sup>a</sup>                         |
|               | 50,000                       | 0/4                                                           |               |                         |                                           |
|               | 100,000                      | 3/5                                                           |               |                         |                                           |
| Young Hypoxia | 25,000                       | 2/4                                                           | 1/20,866      | 1/46,064 to 1/9,452     | 47.9 <sup>b</sup>                         |
|               | 50,000                       | 5/5                                                           |               |                         |                                           |
|               | 100,000                      | 4/4                                                           |               |                         |                                           |
| Old Hypoxia   | 25,000                       | 0/6                                                           | 1/74,772      | 1/156,384 to 1/35,751   | 13.4 <sup>a,b</sup>                       |
|               | 50,000                       | 3/6                                                           |               |                         |                                           |
|               | 100,000                      | 4/4                                                           |               |                         |                                           |

<sup>a</sup>,  $p < 0.05$  when comparing results from transplants receiving young versus old BM donor cells isolated under the same  $O_2$  condition.

<sup>b</sup>,  $p < 0.05$  when comparing results from transplants receiving young versus old BM donor cells isolated under different  $O_2$  conditions.

Table S2: Subpopulation definitions for Figure 6B.

| Color                                                                               | Subpopulation # | Phenotype                                                                                                                                                                                                                                                           |
|-------------------------------------------------------------------------------------|-----------------|---------------------------------------------------------------------------------------------------------------------------------------------------------------------------------------------------------------------------------------------------------------------|
|    | 1               | CD150 <sup>+</sup> cMyc <sup>+</sup> IGF1 <sup>+</sup> Runx1 <sup>+</sup> PDGFβ <sup>+</sup> Gfi1 <sup>+</sup> pErk1/2 <sup>+</sup> TGFβ <sup>+</sup> PI3K <sup>+</sup> pmTOR <sup>+</sup>                                                                          |
|    | 2               | CD150 <sup>h</sup> cMyc <sup>h</sup> IGF1 <sup>+</sup> Runx1 <sup>+</sup> PDGFβ <sup>h</sup> Gfi1 <sup>h</sup> pErk1/2 <sup>+</sup> TGFβ <sup>h</sup> TNFα <sup>+</sup> BMP4 <sup>h</sup> pAkt <sup>+</sup> PI3K <sup>h</sup> pmTOR <sup>h</sup> CEBPβ <sup>h</sup> |
|    | 3               | CD150 <sup>+</sup> cMyc <sup>+</sup> IGF1 <sup>low</sup> Runx1 <sup>+</sup> Gfi1 <sup>+</sup> TGFβ <sup>low</sup> BMP4 <sup>+</sup> PI3K <sup>+</sup> pmTOR <sup>+</sup>                                                                                            |
|    | 4               | CD150 <sup>+</sup> cMyc <sup>+</sup> IGF1 <sup>low</sup> Gfi1 <sup>+</sup> TGFβ <sup>low</sup> BMP4 <sup>+</sup> PI3K <sup>+</sup> pmTOR <sup>+</sup>                                                                                                               |
|    | 5               | CD150 <sup>+</sup> cMyc <sup>+</sup> IGF1 <sup>+</sup> Runx1 <sup>+</sup> Gfi1 <sup>h</sup> TGFβ <sup>h</sup> BMP4 <sup>+</sup> PI3K <sup>+</sup> pmTOR <sup>+</sup>                                                                                                |
|    | 6               | CD150 <sup>+</sup> cMyc <sup>+</sup> IGF1 <sup>+</sup> Runx1 <sup>+</sup> Gfi1 <sup>h</sup> TGFβ <sup>+</sup> BMP4 <sup>+</sup> pAkt <sup>+</sup> PI3K <sup>+</sup> pmTOR <sup>+</sup> CEBPβ <sup>+</sup>                                                           |
|    | 7               | CD150 <sup>h</sup> IGF1 <sup>+</sup> Runx1 <sup>+</sup> Gfi1 <sup>h</sup> pErk <sup>+</sup> TGFβ <sup>+</sup> BMP4 <sup>+</sup> pAkt <sup>+</sup> PI3K <sup>+</sup> pmTOR <sup>+</sup>                                                                              |
|    | 8               | CD150 <sup>h</sup> cMyc <sup>+</sup> IGF1 <sup>+</sup> Gfi1 <sup>h</sup> pErk <sup>+</sup> TGFβ <sup>+</sup> BMP4 <sup>+</sup> PI3K <sup>+</sup> pmTOR <sup>+</sup> CEBPβ <sup>+</sup>                                                                              |
|  | 9               | CD150 <sup>+</sup> cMyc <sup>h</sup> IGF1 <sup>+</sup> Runx1 <sup>+</sup> PDGFβ <sup>+</sup> Gfi1 <sup>h</sup> TGFβ <sup>h</sup> BMP4 <sup>low</sup> pAkt <sup>+</sup> PI3K <sup>h</sup> pmTOR <sup>h</sup> CEBPβ <sup>h</sup>                                      |
|  | 10              | CD150 <sup>h</sup> cMyc <sup>h</sup> IGF1 <sup>+</sup> Runx1 <sup>+</sup> PDGFβ <sup>+</sup> Gfi1 <sup>h</sup> pErk <sup>+</sup> TGFβ <sup>+</sup> BMP4 <sup>+</sup> pAkt <sup>+</sup> PI3K <sup>h</sup> pmTOR <sup>h</sup> CEBPβ <sup>h</sup>                      |

Table S3: Antibodies used for CyTOF.

| Antibody Targets                                                                  | Company      | Clone(s)     | Metal Conjugate |
|-----------------------------------------------------------------------------------|--------------|--------------|-----------------|
| Lineage Cocktail (Lin; includes markers CD3/GR-1 CD11b/B220/Ter-119) <sup>a</sup> | BioLegend    | Cat. #133301 | 160Gd           |
| Stem Cell Antigen 1 (Sca1; a.k.a. Ly6a) <sup>b</sup>                              | Invitrogen   | D7           | 145Nd           |
| cKit (a.k.a. CD117 and Stem Cell Factor Receptor)                                 | Fluidigm     | 2B8          | 166Er           |
| CD48                                                                              | Fluidigm     | HM48.1       | 156Gd           |
| CD150 (a.k.a. Signaling Lymphocytic-Activation Molecule or SLAM) <sup>c</sup>     | Invitrogen   | 9D1          | 176Yb           |
| CD166 (a.k.a. Activated Leukocyte Cell Adhesion Molecule or ALCAM)                | eBioscience  | eBioALC48    | 151Eu           |
| Octamer-Binding Transcription Factor 3/4 (Oct3/4; a.k.a. POU5f1)                  | DVS Sciences | 40/Oct-3     | 165Ho           |
| Tumour Necrosis Factor $\alpha$ (TNF $\alpha$ )                                   | Fluidigm     | MP6-XT22     | 165Dy           |
| Platelet-Derived Growth Factor $\beta$ (PDGF $\beta$ )                            | Fluidigm     | Polyclonal   | 169Tm           |
| Insulin-Like Growth Factor 1 (IGF1)                                               | Fluidigm     | Polyclonal   | 174Yb           |
| Transforming Growth Factor $\beta$ (TGF $\beta$ )                                 | Fluidigm     | TW7-16B4     | 164Dy           |
| CCAAT/Enhancer-Binding Protein $\beta$ (CEBP $\beta$ ) <sup>d</sup>               | BioLegend    | 1H7          | 141Pr           |
| Bone Morphogenetic Protein 4 (BMP4) <sup>d</sup>                                  | Invitrogen   | Polyclonal   | 159Tb           |
| Runt-Related Transcription Factor 1 (Runx1) <sup>d</sup>                          | Invitrogen   | 3H2L6        | 170Er           |
| GATA Binding Protein 1 (GATA1) <sup>d</sup>                                       | R&D Systems  | 234737       | 149Sm           |
| cMyc <sup>d</sup>                                                                 | Invitrogen   | 9E10         | 175Lu           |
| Notch1 <sup>d</sup>                                                               | BioLegend    | HMN1-12      | 171Yb           |
| Growth Factor Independent 1 Transcriptional Repressor (Gfi1) <sup>d</sup>         | Invitrogen   | Polyclonal   | 168Er           |
| Phosphoinositide 3-kinase p85 $\alpha$ (PI3K) <sup>d</sup>                        | NOVUS        | 6G10         | 150Nd           |
| Akt [pS473] (a.k.a. pAKT or Protein Kinase B)                                     | Fluidigm     | D9E          | 152Sm           |
| Extracellular Signal-Regulated Kinase 1/2 [202/204] (a.k.a. pERK1/2)              | Fluidigm     | D13.14.4E    | 167Er           |
| Signal Transducer and Activator of Transcription 3 [Y705] (a.k.a. pSTAT3)         | Fluidigm     | 4/P-STAT3    | 158Gd           |
| Mammalian Target of Rapamycin [Ser2448] (a.k.a. pmTOR) <sup>d</sup>               | BioLegend    | A17024A      | 143Nd           |

<sup>a</sup>, Lineage cocktail antibodies were conjugated to FITC. A secondary anti-FITC antibody was used (Fluidigm; clone FIT-22).

<sup>b</sup>, Anti-Sca1 antibody was conjugated to PE. A secondary anti-PE antibody was used (DVS Sciences; clone PE001).

<sup>c</sup>, Anti-CD150 antibody was conjugated to APC. A secondary anti-APC antibody was used (Fluidigm; clone APC003).

<sup>d</sup>, Antibodies were conjugated to metals in house using the Maxpar Antibody Labeling kit (Fluidigm).
